# Supplementary material for: Sensitive and fast identification of bacteria in blood samples by immunoaffinity mass spectrometry for quick BSI diagnosis
Source: PubMed Central journal article supplement (PMC6004777; doi:10.1039/c5sc04919a), 2016-01-26
Supplement: SC-007-C5SC04919A-s001.pdf [file SC-007-C5SC04919A-s001.pdf]

Electronic Supplementary Information (ESI) for:

## **Sensitive and fast identification of bacteria in blood samples by immunoaffinity mass spectrometry for quick BSI diagnosis**

Yingdi Zhu<sup>a</sup>, Liang Qiao<sup>a,e</sup>, Michel Prudent<sup>b</sup>, Alexandra Bondarenko<sup>a</sup>, Natalia Gasilova<sup>a</sup>, Siham Beggah Möller<sup>c</sup>, Niels Lion<sup>b</sup>, Horst Pick<sup>d</sup>, Tianqi Gong<sup>e</sup>, Zhuoxin Chen<sup>e</sup>, Pengyuan Yang<sup>e</sup>, Lysiane Tissières Lovey,<sup>f</sup> and Hubert H. Girault<sup>a\*</sup>

- a. Laboratoire d'Electrochimie Physique et Analytique, École Polytechnique  
Fédérale de Lausanne, Rue de l'industrie 17, CH-1951 Sion, Switzerland
- b. Transfusion Interrégionale CRS, Laboratoire de Recherche sur les Produits  
Sanguins, CH-1015 Lausanne, Switzerland
- c. Department of Fundamental Microbiology, University of Lausanne, CH-1015  
Lausanne, Switzerland
- d. Laboratoire de Chimie Physique des Polymères et Membranes, École  
Polytechnique Fédérale de Lausanne, CH-1015 Lausanne, Switzerland
- e. Institutes of Biomedical Sciences, Fudan University, Dong'an Road 131, 200032,  
Shanghai, China
- f. Hôpital du Valais, Sion, Avenue du Grand Champsec 80, CH-1951 Sion,  
Switzerland

\*: Corresponding Author: Prof. H. H. Girault, E-mail: [hubert.girault@epfl.ch](mailto:hubert.girault@epfl.ch)

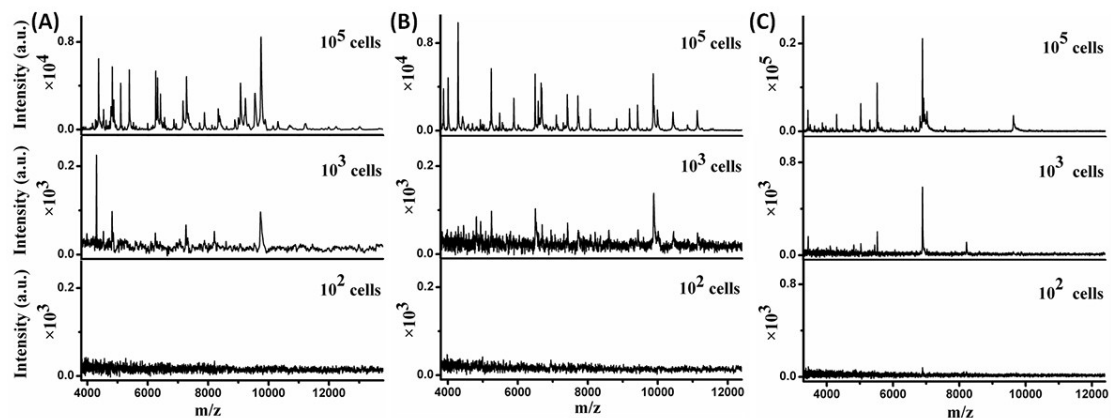

**Fig. S1** Direct MALDI-TOF MS fingerprinting of (A) *E.coli*, (B) *B.subtilis*, and (C) *S.aureus* by routine MALDI sample deposition procedure at different cell numbers:  $10^5$  cells ( $10^8$  cells  $\text{mL}^{-1} \times 1 \mu\text{L}$ ),  $10^3$  cells ( $10^6$  cells  $\text{mL}^{-1} \times 1 \mu\text{L}$ ),  $10^2$  cells ( $10^5$  cells  $\text{mL}^{-1} \times 1 \mu\text{L}$ ).

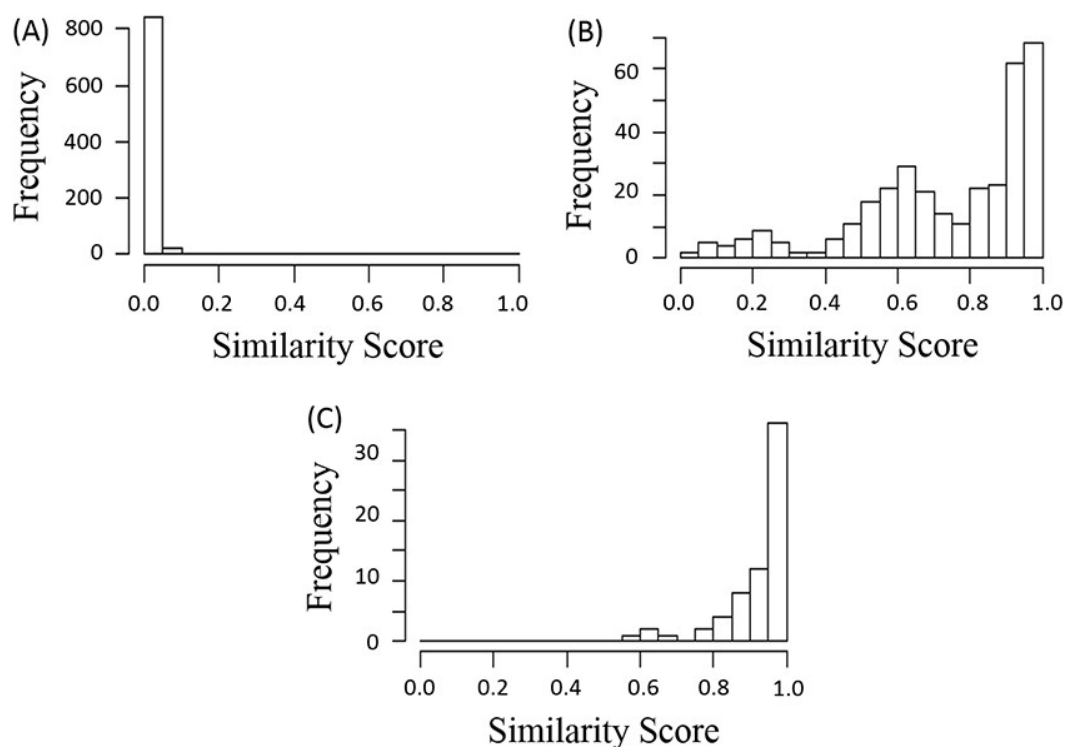

**Fig.S2** The frequency distribution of similarity scores between bacteria reference mass spectra for three groups: (A) reference spectra obtained from different bacteria; (B) reference spectra obtained from the same bacteria but at different cell numbers; (C) reference spectra obtained from different repetitions of the same bacteria at the same cell number.

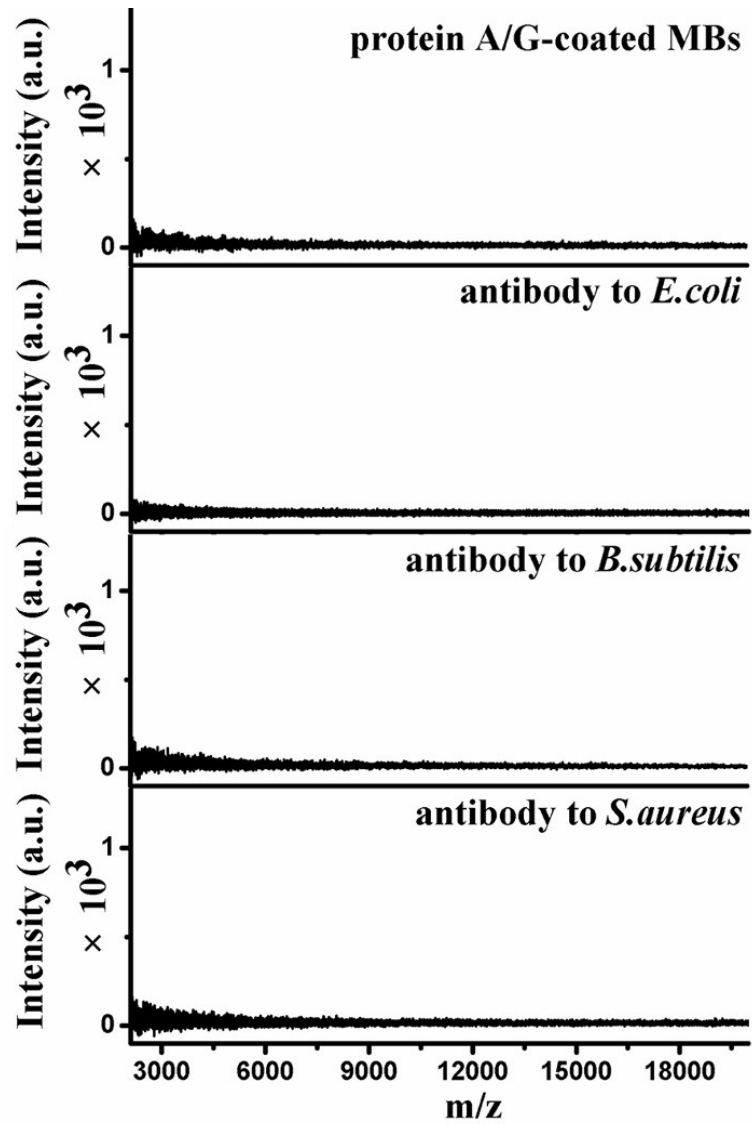

**Fig. S3** MALDI-TOF mass spectra of protein A/G-coated magnetic beads (MBs) and anti-bacteria antibodies in the mass range of 2,000-20,000 *m/z*.

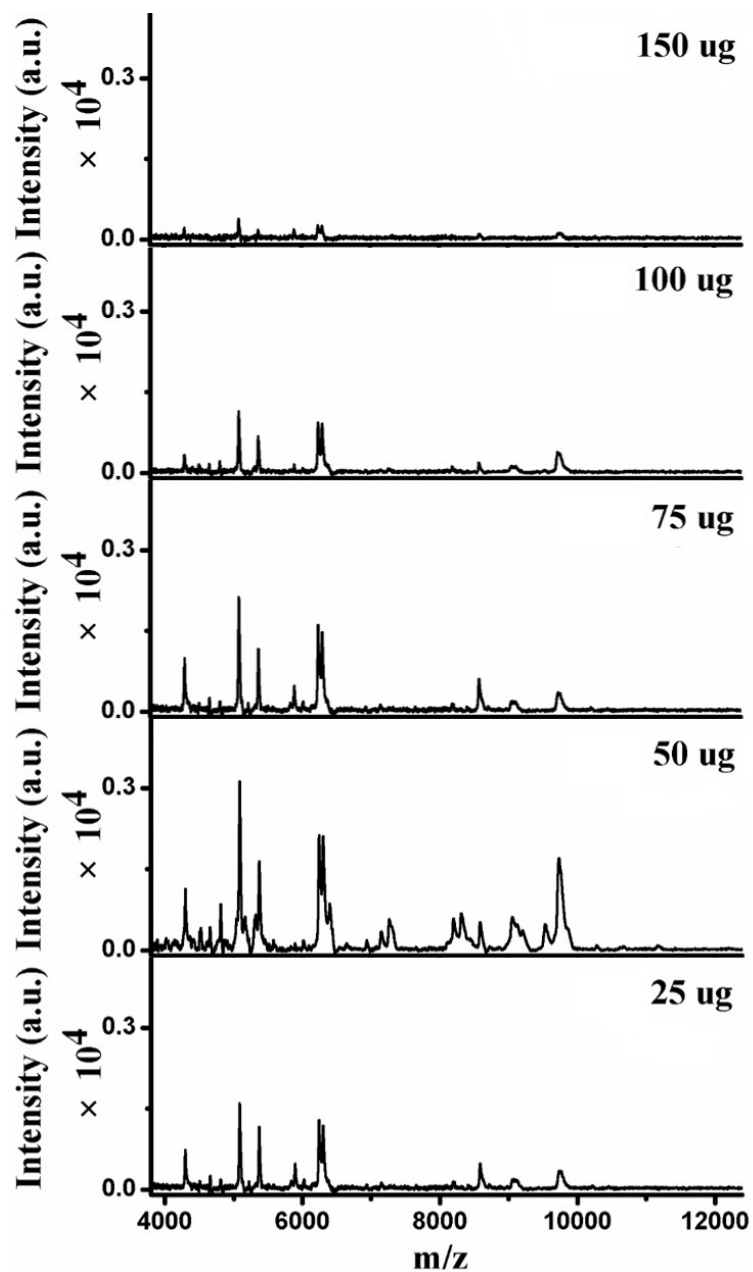

**Fig. S4** Immunoaffinity MALDI-TOF mass spectra obtained from aqueous solutions (1 mL) with  $10^4$  cells  $\text{mL}^{-1}$  *E.coli* when different amounts of Abs-MBs were used.

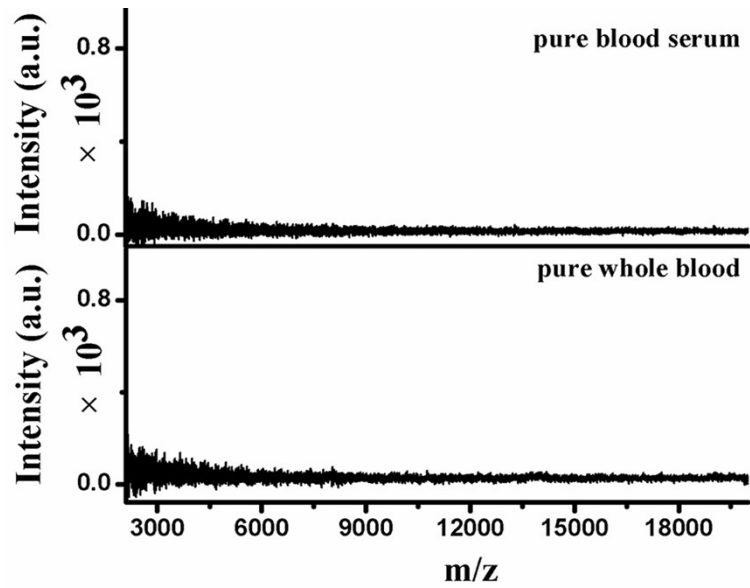

**Fig. S5** Immunoaffinity MALDI-TOF mass spectra of pure blood serum and pure whole blood after sample pre-treatment by using anti-*E.coli* Abs-MBs in the mass range of 2,000-20,000  $m/z$ .

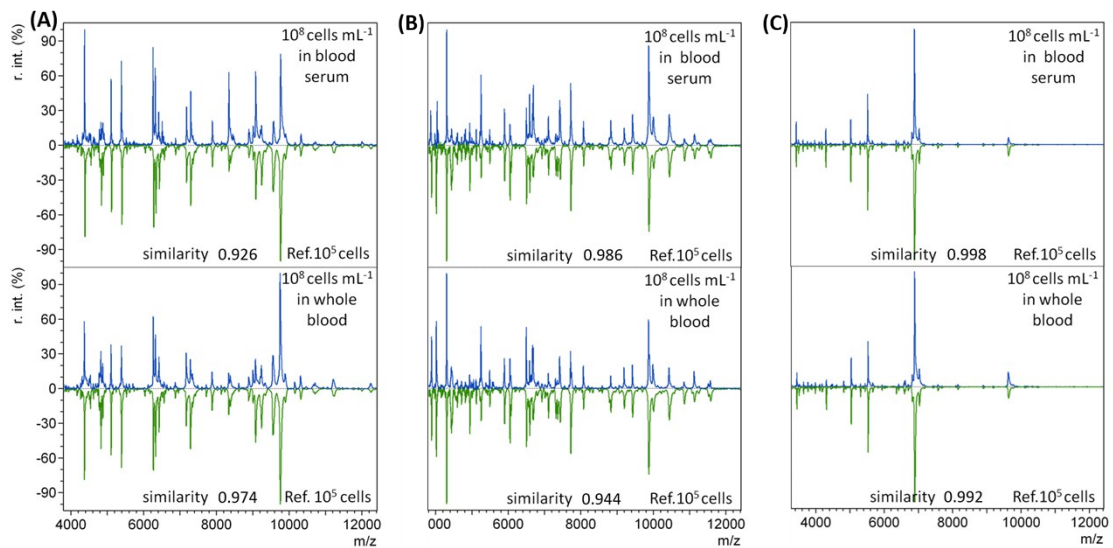

**Fig.S6** Immunoaffinity MALDI-TOF mass spectra (in blue) obtained from blood serum and whole blood spiked with  $10^8$  cells  $mL^{-1}$  of (A) *E.coli*, (B) *B.subtilis*, and (C) *S.aureus* and comparison with reference spectra (in green) of corresponding species at  $10^5$  cells with similarity score calculated by the cosine correlation method. r.int: relative intensity.

**Table S1.** List of peaks ( $S/N \geq 3$ ), including nominal  $m/z$  values and normalized intensities ( $I_N$ ), for mass spectra in Fig.2. The matching tolerance is set as 1000 ppm.

(A) for *E.coli* in Fig. 2A

| 500 cells mL <sup>-1</sup><br>in blood serum |        | 8000 cells mL <sup>-1</sup><br>in whole blood |        | reference spectrum<br>at 10 cells |        |
|----------------------------------------------|--------|-----------------------------------------------|--------|-----------------------------------|--------|
| $m/z$                                        | $I_N$  | $m/z$                                         | $I_N$  | $m/z$                             | $I_N$  |
| 4135                                         | 29.11  | 4135                                          | 38.68  | 4136                              | 23.57  |
| 4315                                         | 71.96  | 4314                                          | 100.00 | 4313                              | 100.00 |
| 4545                                         | 44.07  | 4546                                          | 42.19  | 4547                              | 64.63  |
| 4832                                         | 100.00 | 4830                                          | 89.84  | 4830                              | 94.17  |
| 5390                                         | 30.83  | 5391                                          | 39.76  | 5392                              | 41.10  |
| 8230                                         | 51.37  | 8229                                          | 70.66  | 8227                              | 81.44  |
| 8618                                         | 32.13  | 8616                                          | 50.65  | 8615                              | 52.06  |
| 9757                                         | 11.02  | 9754                                          | 18.57  | 9755                              | 15.42  |

(B) for *B.subtilis* in Fig. 2B

| 500 cells mL <sup>-1</sup><br>in blood serum |        | 8000 cells mL <sup>-1</sup><br>in whole blood |        | reference spectrum<br>at 10 cells |        |
|----------------------------------------------|--------|-----------------------------------------------|--------|-----------------------------------|--------|
| $m/z$                                        | $I_N$  | $m/z$                                         | $I_N$  | $m/z$                             | $I_N$  |
| 4019                                         | 100.00 | 4018                                          | 100.00 | 4017                              | 100.00 |
| 4145                                         | 29.32  | 4141                                          | 23.14  | 4143                              | 45.50  |
| 4302                                         | 60.08  | 4301                                          | 62.36  | 4300                              | 90.47  |
| 4418                                         | 15.37  | 4419                                          | 21.49  | 4420                              | 32.15  |
| 4531                                         | 21.65  | 4531                                          | 20.10  | 4533                              | 33.06  |
| 4817                                         | 52.23  | 4816                                          | 84.51  | 4817                              | 62.14  |
| 4940                                         | 24.92  | 4940                                          | 35.16  | 4940                              | 41.84  |
| 6048                                         | 26.48  | 6048                                          | 37.90  | 6049                              | 39.70  |
| 6504                                         | 22.22  | 6501                                          | 31.17  | 6503                              | 31.16  |
| 6929                                         | 42.70  | 6930                                          | 60.82  | 6928                              | 62.55  |
| 8202                                         | 27.87  | 8202                                          | 52.79  | 8203                              | 60.21  |
| 8590                                         | 48.77  | 8591                                          | 66.78  | 8589                              | 69.87  |
| 9870                                         | 32.52  | 9874                                          | 44.73  | 9870                              | 61.63  |
| 10856                                        | 10.79  | 10857                                         | 10.95  | 10854                             | 13.81  |

(C) for *S.aureus* in Fig. 2C

| 500 cells mL <sup>-1</sup><br>in blood serum |                | 8000 cells mL <sup>-1</sup><br>in whole blood |                | reference spectrum<br>at 10 cells |                |
|----------------------------------------------|----------------|-----------------------------------------------|----------------|-----------------------------------|----------------|
| <i>m/z</i>                                   | I <sub>N</sub> | <i>m/z</i>                                    | I <sub>N</sub> | <i>m/z</i>                        | I <sub>N</sub> |
| 3444                                         | 23.62          | 3446                                          | 51.92          | 3445                              | 25.53          |
| 4110                                         | 8.39           | 4111                                          | 14.25          | 4110                              | 9.26           |
| 4308                                         | 10.25          | 4309                                          | 16.90          | 4308                              | 8.35           |
| 4817                                         | 12.53          | 4819                                          | 13.36          | 4817                              | 9.12           |
| 5036                                         | 15.75          | 5037                                          | 12.02          | 5035                              | 11.60          |
| 5444                                         | 19.85          | 5445                                          | 10.82          | 5445                              | 10.37          |
| 5527                                         | 32.61          | 5529                                          | 33.85          | 5528                              | 25.53          |
| 6890                                         | 100.00         | 6892                                          | 100.00         | 6891                              | 100.00         |
| 8214                                         | 17.92          | 8216                                          | 25.83          | 8215                              | 19.38          |

**Table S2.** List of peaks ( $S/N \geq 3$ ), including nominal  $m/z$  values and normalized intensities ( $I_N$ ), for mass spectra in Fig.3. The matching tolerance is 1000 ppm.

(A) for mass spectra obtained from Bottle 1,2, and the reference spectrum

| mass spectrum<br>from Bottle 1 |        | mass spectrum<br>from Bottle 2 |        | reference spectrum<br>of $10^5$ <i>E.coli</i> cells |        |
|--------------------------------|--------|--------------------------------|--------|-----------------------------------------------------|--------|
| $m/z$                          | $I_N$  | $m/z$                          | $I_N$  | $m/z$                                               | $I_N$  |
| 4312                           | 12.03  | 4164                           | 4.30   | 4162                                                | 6.25   |
| 4379                           | 37.05  | 4315                           | 4.61   | 4268                                                | 9.25   |
| 4545                           | 10.08  | 4377                           | 78.84  | 4313                                                | 6.19   |
| 4782                           | 5.57   | 4546                           | 9.85   | 4378                                                | 80.94  |
| 4830                           | 5.49   | 4782                           | 6.99   | 4547                                                | 17.85  |
| 4878                           | 15.46  | 4828                           | 6.42   | 4618                                                | 9.26   |
| 5112                           | 52.06  | 4877                           | 13.64  | 4780                                                | 19.42  |
| 5394                           | 18.12  | 5109                           | 99.31  | 4830                                                | 53.23  |
| 5528                           | 3.09   | 5394                           | 43.72  | 4876                                                | 26.78  |
| 6268                           | 49.49  | 5528                           | 3.89   | 5108                                                | 58.94  |
| 6328                           | 32.16  | 6268                           | 74.65  | 5392                                                | 69.97  |
| 6424                           | 14.97  | 6328                           | 59.80  | 5526                                                | 7.38   |
| 6559                           | 3.91   | 6424                           | 33.17  | 6036                                                | 6.57   |
| 6870                           | 9.41   | 6557                           | 20.48  | 6266                                                | 71.93  |
| 7173                           | 17.97  | 6869                           | 21.10  | 6326                                                | 59.60  |
| 7287                           | 100.00 | 7170                           | 14.96  | 6422                                                | 38.30  |
| 7883                           | 4.95   | 7286                           | 100.00 | 6559                                                | 12.94  |
| 8129                           | 4.07   | 7882                           | 18.47  | 6869                                                | 8.46   |
| 8341                           | 9.79   | 8130                           | 10.87  | 7170                                                | 32.57  |
| 8893                           | 9.14   | 8337                           | 23.64  | 7286                                                | 52.38  |
| 9010                           | 9.00   | 8889                           | 10.92  | 7880                                                | 19.09  |
| 9073                           | 24.04  | 9010                           | 11.78  | 8132                                                | 4.86   |
| 9240                           | 14.82  | 9073                           | 44.35  | 8340                                                | 22.40  |
| 9558                           | 13.62  | 9239                           | 14.37  | 8891                                                | 9.50   |
| 9756                           | 51.20  | 9554                           | 12.67  | 9013                                                | 12.21  |
| 9894                           | 7.78   | 9752                           | 59.24  | 9071                                                | 45.94  |
| 10156                          | 2.29   | 9894                           | 5.33   | 9242                                                | 34.65  |
| 10318                          | 2.31   | 10154                          | 2.40   | 9556                                                | 40.95  |
| 10705                          | 2.63   | 10318                          | 5.41   | 9755                                                | 100.00 |
| 11233                          | 4.24   | 10704                          | 3.92   | 9896                                                | 12.06  |
| 12245                          | 4.43   | 11232                          | 3.23   | 10159                                               | 4.23   |
|                                |        | 12245                          | 2.71   | 10322                                               | 9.33   |
|                                |        |                                |        | 10704                                               | 4.62   |
|                                |        |                                |        | 11237                                               | 6.47   |
|                                |        |                                |        | 12249                                               | 3.12   |



(B) for mass spectra obtained from Bottle 3,4, and the reference spectrum

| mass spectrum<br>from Bottle 3 |                | mass spectrum<br>from Bottle 4 |                | reference spectrum<br>of 10 <sup>5</sup> <i>S.aureus</i> cells |                |
|--------------------------------|----------------|--------------------------------|----------------|----------------------------------------------------------------|----------------|
| <i>m/z</i>                     | I <sub>N</sub> | <i>m/z</i>                     | I <sub>N</sub> | <i>m/z</i>                                                     | I <sub>N</sub> |
| 3444                           | 15.62          | 3444                           | 9.8            | 3445                                                           | 19.69          |
| 3510                           | 5.75           | 3510                           | 13.03          | 3511                                                           | 7.98           |
| 3570                           | 3.94           | 3571                           | 11.34          | 3641                                                           | 6.4            |
| 3640                           | 2.5            | 3640                           | 3.44           | 3769                                                           | 4.3            |
| 3768                           | 2.21           | 3768                           | 21.14          | 3879                                                           | 2.51           |
| 3878                           | 1.52           | 3878                           | 7.47           | 3983                                                           | 6.18           |
| 3982                           | 2.31           | 3913                           | 5.85           | 4110                                                           | 3.59           |
| 4110                           | 1.96           | 3983                           | 5.78           | 4194                                                           | 4.41           |
| 4192                           | 1.62           | 4111                           | 3.56           | 4308                                                           | 20.4           |
| 4308                           | 4.57           | 4193                           | 8.29           | 4443                                                           | 2.1            |
| 4441                           | 1.75           | 4307                           | 8.67           | 4591                                                           | 1.62           |
| 4592                           | 1.3            | 4444                           | 3.05           | 4817                                                           | 4.97           |
| 4762                           | 4.69           | 4592                           | 1.32           | 4879                                                           | 2.23           |
| 4817                           | 3.85           | 4713                           | 2.99           | 5035                                                           | 33.35          |
| 4877                           | 1.21           | 4815                           | 3.14           | 5171                                                           | 2.57           |
| 5033                           | 23.08          | 4878                           | 4.75           | 5307                                                           | 8.86           |
| 5169                           | 1.73           | 5034                           | 21.36          | 5387                                                           | 1.62           |
| 5305                           | 2.34           | 5170                           | 1.29           | 5445                                                           | 4.34           |
| 5385                           | 1.26           | 5306                           | 2.57           | 5528                                                           | 57.72          |
| 5443                           | 3.44           | 5386                           | 1.02           | 5665                                                           | 4.67           |
| 5527                           | 59.55          | 5443                           | 2.2            | 5820                                                           | 1.22           |
| 5663                           | 5.65           | 5527                           | 36.98          | 5936                                                           | 3.2            |
| 5822                           | 0.98           | 5663                           | 3.52           | 6013                                                           | 1.52           |
| 6010                           | 1.21           | 5819                           | 0.41           | 6356                                                           | 6.21           |
| 6423                           | 2.72           | 5935                           | 0.61           | 6425                                                           | 3.41           |
| 6572                           | 6.33           | 6011                           | 0.85           | 6572                                                           | 6.21           |
| 6702                           | 4.46           | 6244                           | 1.61           | 6703                                                           | 3.35           |
| 6818                           | 7.61           | 6355                           | 0.67           | 6821                                                           | 12.73          |
| 6890                           | 100            | 6425                           | 2.01           | 6891                                                           | 100            |
| 7029                           | 13.07          | 6574                           | 3.56           | 7032                                                           | 16.79          |
| 7165                           | 2.11           | 6703                           | 2.32           | 7168                                                           | 1.69           |
| 7571                           | 1.3            | 6819                           | 9.14           | 7574                                                           | 3.38           |
| 8212                           | 1.35           | 6890                           | 100            | 8215                                                           | 2.51           |
| 8895                           | 0.83           | 7029                           | 13.67          | 8898                                                           | 1.42           |
| 9185                           | 0.36           | 7165                           | 1.77           | 9185                                                           | 1.16           |
| 9625                           | 8.63           | 7571                           | 0.78           | 9626                                                           | 9.81           |
|                                |                | 8213                           | 1.2            |                                                                |                |
|                                |                | 8897                           | 0.87           |                                                                |                |
|                                |                | 9182                           | 0.37           |                                                                |                |
|                                |                | 9627                           | 6.3            |                                                                |                |

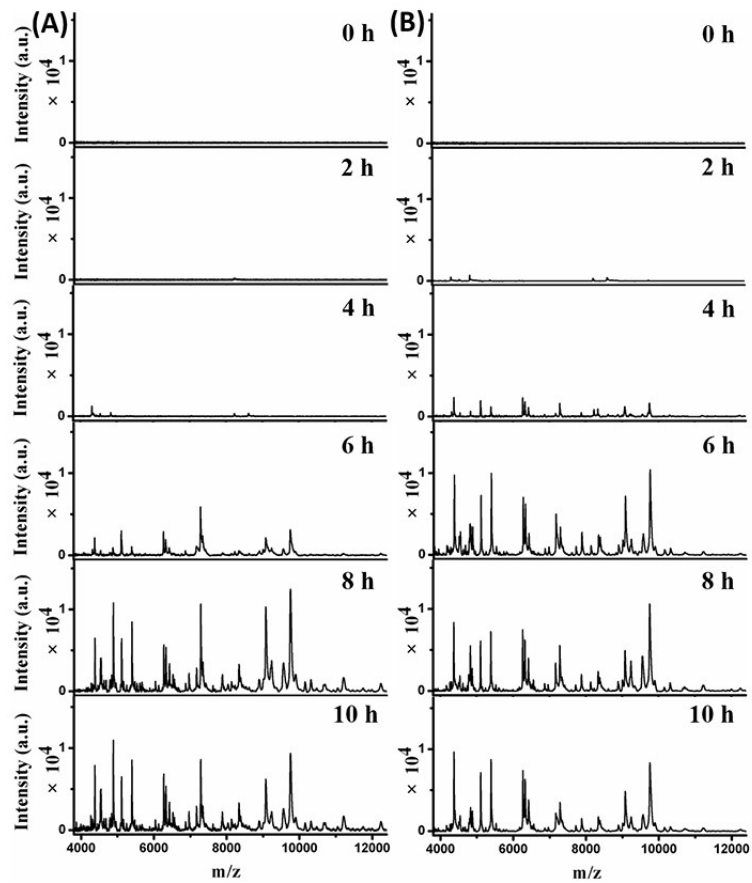

**Fig.S7** Immunoaffinity MALDI-TOF mass spectra obtained from BC bottles (bottles II) with initial *E.coli* concentration of (A)  $10^2$  cells  $\text{mL}^{-1}$ , or (B)  $10^3$  cells  $\text{mL}^{-1}$  in 5 mL blood after different BC time: 0h, 2h, 4h, 6h, 8h,10h.

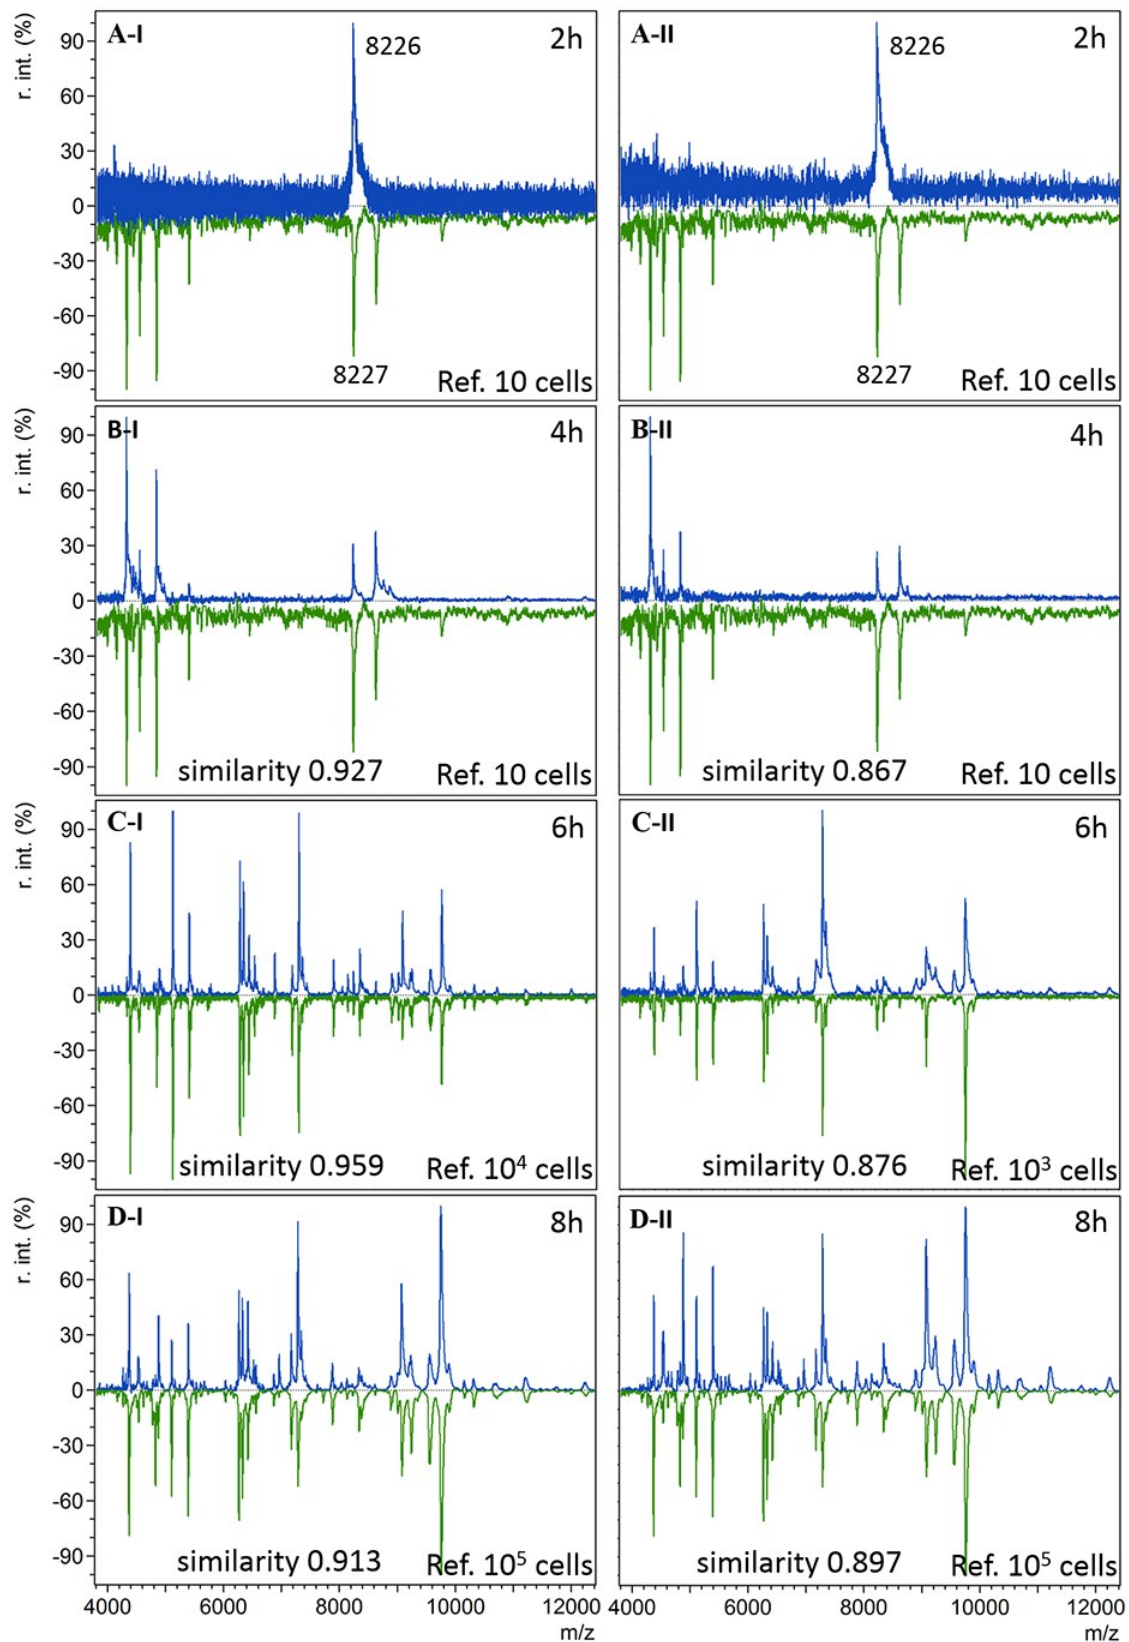

**Fig.S8** Comparison between the reference spectra of *E.coli* (in green) and immunoaffinity MALDI-TOF mass spectra obtained from two BC bottles (I, II) with initial *E.coli* concentration of  $10^2$  cells  $\text{mL}^{-1}$  in 5 mL blood after different BC time (in blue, from Fig.4A and Fig.S7-A). I, II refer to bottle I and II, respectively. Similarity scores were calculated by the cosine correlation method. r.int: relative intensity.

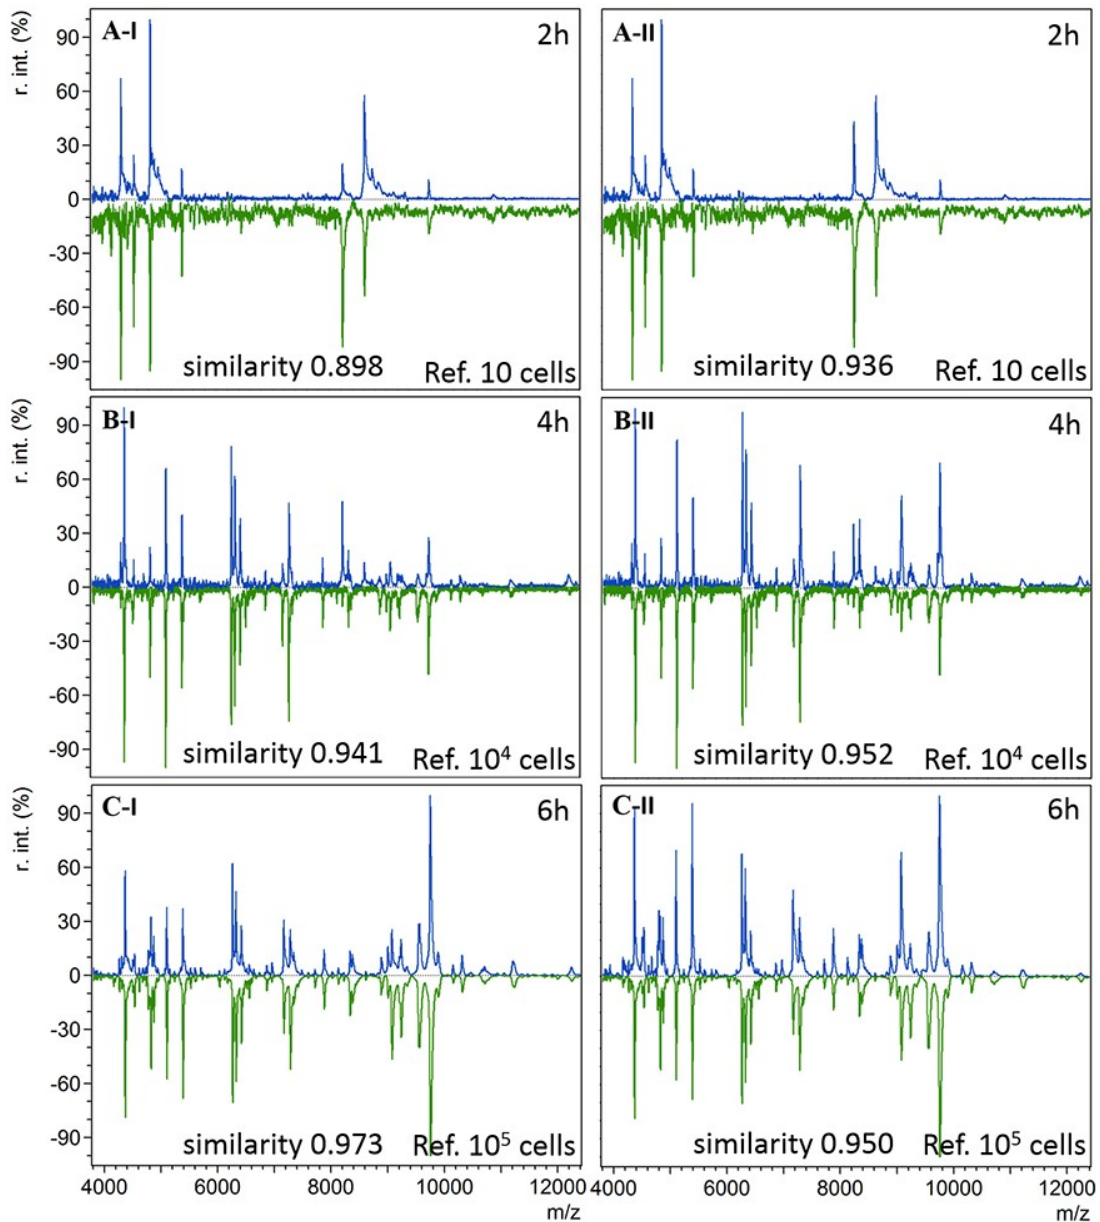

**Fig.S9** Comparison between the reference spectra of *E.coli* (in green) and immunoaffinity MALDI-TOF mass spectra obtained from two blood culture bottles (I, II) with initial *E.coli* concentration of  $10^3$  cells  $\text{mL}^{-1}$  in 5 mL blood after different BC time (in blue, from Fig.4B and Fig.S7-B). I, II refer to bottle I and II, respectively. Similarity scores were calculated by the cosine correlation method. r.int: relative intensity.

**Table S3** List of pattern matching results (with highest similarity scores) for all samples analyzed in this work by the immunoaffinity MALDI-TOF MS method. Sample name with 1-3 means three repetitions.

| No. | Sample Name                                                               | Reference Spectrum                      | Similarity Score |
|-----|---------------------------------------------------------------------------|-----------------------------------------|------------------|
| 1   | 10 <sup>8</sup> <i>E.coli</i> cells mL <sup>-1</sup> in blood serum-1     | 10 <sup>5</sup> <i>E.coli</i> cells     | 0.926            |
| 2   | 10 <sup>8</sup> <i>E.coli</i> cells mL <sup>-1</sup> in blood serum-2     | 10 <sup>5</sup> <i>E.coli</i> cells     | 0.976            |
| 3   | 10 <sup>8</sup> <i>E.coli</i> cells mL <sup>-1</sup> in blood serum-3     | 10 <sup>5</sup> <i>E.coli</i> cells     | 0.956            |
| 4   | 10 <sup>8</sup> <i>E.coli</i> cells mL <sup>-1</sup> in whole blood-1     | 10 <sup>5</sup> <i>E.coli</i> cells     | 0.974            |
| 5   | 10 <sup>8</sup> <i>E.coli</i> cells mL <sup>-1</sup> in whole blood-2     | 10 <sup>5</sup> <i>E.coli</i> cells     | 0.981            |
| 6   | 10 <sup>8</sup> <i>E.coli</i> cells mL <sup>-1</sup> in whole blood-3     | 10 <sup>5</sup> <i>E.coli</i> cells     | 0.943            |
| 7   | 10 <sup>8</sup> <i>B.subtilis</i> cells mL <sup>-1</sup> in blood serum-1 | 10 <sup>5</sup> <i>B.subtilis</i> cells | 0.986            |
| 8   | 10 <sup>8</sup> <i>B.subtilis</i> cells mL <sup>-1</sup> in blood serum-2 | 10 <sup>5</sup> <i>B.subtilis</i> cells | 0.972            |
| 9   | 10 <sup>8</sup> <i>B.subtilis</i> cells mL <sup>-1</sup> in blood serum-3 | 10 <sup>5</sup> <i>B.subtilis</i> cells | 0.970            |
| 10  | 10 <sup>8</sup> <i>B.subtilis</i> cells mL <sup>-1</sup> in whole blood-1 | 10 <sup>5</sup> <i>B.subtilis</i> cells | 0.944            |
| 11  | 10 <sup>8</sup> <i>B.subtilis</i> cells mL <sup>-1</sup> in whole blood-2 | 10 <sup>5</sup> <i>B.subtilis</i> cells | 0.979            |
| 12  | 10 <sup>8</sup> <i>B.subtilis</i> cells mL <sup>-1</sup> in whole blood-3 | 10 <sup>5</sup> <i>B.subtilis</i> cells | 0.951            |
| 13  | 10 <sup>8</sup> <i>S.aureus</i> cells mL <sup>-1</sup> in blood serum-1   | 10 <sup>5</sup> <i>S.aureus</i> cells   | 0.998            |
| 14  | 10 <sup>8</sup> <i>S.aureus</i> cells mL <sup>-1</sup> in blood serum-2   | 10 <sup>5</sup> <i>S.aureus</i> cells   | 0.993            |
| 15  | 10 <sup>8</sup> <i>S.aureus</i> cells mL <sup>-1</sup> in blood serum-3   | 10 <sup>5</sup> <i>S.aureus</i> cells   | 0.988            |
| 16  | 10 <sup>8</sup> <i>S.aureus</i> cells mL <sup>-1</sup> in whole blood-1   | 10 <sup>5</sup> <i>S.aureus</i> cells   | 0.992            |
| 17  | 10 <sup>8</sup> <i>S.aureus</i> cells mL <sup>-1</sup> in whole blood-2   | 10 <sup>5</sup> <i>S.aureus</i> cells   | 0.986            |
| 18  | 10 <sup>8</sup> <i>S.aureus</i> cells mL <sup>-1</sup> in whole blood-3   | 10 <sup>5</sup> <i>S.aureus</i> cells   | 0.980            |
| 19  | 500 <i>E.coli</i> cells mL <sup>-1</sup> in blood serum-1                 | 10 <i>E.coli</i> cells                  | 0.975            |
| 20  | 500 <i>E.coli</i> cells mL <sup>-1</sup> in blood serum-2                 | 10 <i>E.coli</i> cells                  | 0.954            |
| 21  | 500 <i>E.coli</i> cells mL <sup>-1</sup> in blood serum-3                 | 10 <i>E.coli</i> cells                  | 0.980            |
| 22  | 8000 <i>E.coli</i> cells mL <sup>-1</sup> in whole blood-1                | 10 <i>E.coli</i> cells                  | 0.988            |
| 23  | 8000 <i>E.coli</i> cells mL <sup>-1</sup> in whole blood-2                | 10 <i>E.coli</i> cells                  | 0.971            |
| 24  | 8000 <i>E.coli</i> cells mL <sup>-1</sup> in whole blood-3                | 10 <i>E.coli</i> cells                  | 0.957            |
| 25  | 500 <i>B.subtilis</i> cells mL <sup>-1</sup> in blood serum-1             | 10 <i>B.subtilis</i> cells              | 0.973            |
| 26  | 500 <i>B.subtilis</i> cells mL <sup>-1</sup> in blood serum-2             | 10 <i>B.subtilis</i> cells              | 0.978            |
| 27  | 500 <i>B.subtilis</i> cells mL <sup>-1</sup> in blood serum-3             | 10 <i>B.subtilis</i> cells              | 0.959            |
| 28  | 8000 <i>B.subtilis</i> cells mL <sup>-1</sup> in whole blood-1            | 10 <i>B.subtilis</i> cells              | 0.975            |
| 29  | 8000 <i>B.subtilis</i> cells mL <sup>-1</sup> in whole blood-2            | 10 <i>B.subtilis</i> cells              | 0.956            |
| 30  | 8000 <i>B.subtilis</i> cells mL <sup>-1</sup> in whole blood-3            | 10 <i>B.subtilis</i> cells              | 0.954            |
| 31  | 500 <i>S.aureus</i> cells mL <sup>-1</sup> in blood serum-1               | 10 <i>S.aureus</i> cells                | 0.993            |
| 32  | 500 <i>S.aureus</i> cells mL <sup>-1</sup> in blood serum-2               | 10 <i>S.aureus</i> cells                | 0.984            |
| 33  | 500 <i>S.aureus</i> cells mL <sup>-1</sup> in blood serum-3               | 10 <i>S.aureus</i> cells                | 0.979            |
| 34  | 8000 <i>S.aureus</i> cells mL <sup>-1</sup> in whole blood-1              | 10 <i>S.aureus</i> cells                | 0.973            |
| 35  | 8000 <i>S.aureus</i> cells mL <sup>-1</sup> in whole blood-2              | 10 <i>S.aureus</i> cells                | 0.963            |
| 36  | 8000 <i>S.aureus</i> cells mL <sup>-1</sup> in whole blood-3              | 10 <i>S.aureus</i> cells                | 0.950            |
| 37  | <i>S.aureus</i> -spiked accuracy test sample-1                            | 10 <sup>5</sup> <i>S.aureus</i> cells   | 0.991            |
| 38  | <i>S.aureus</i> -spiked accuracy test sample-2                            | 10 <sup>5</sup> <i>S.aureus</i> cells   | 0.990            |

|    |                                                                    |                                       |       |
|----|--------------------------------------------------------------------|---------------------------------------|-------|
| 39 | <i>S.aureus</i> -spiked accuracy test sample-3                     | 10 <sup>4</sup> <i>S.aureus</i> cells | 0.997 |
| 40 | <i>S.aureus</i> -spiked accuracy test sample-4                     | 10 <sup>4</sup> <i>S.aureus</i> cells | 0.992 |
| 41 | <i>S.aureus</i> -spiked accuracy test sample-5                     | 10 <sup>4</sup> <i>S.aureus</i> cells | 0.991 |
| 42 | <i>S.aureus</i> -spiked accuracy test sample-6                     | 10 <sup>4</sup> <i>S.aureus</i> cells | 0.989 |
| 43 | <i>S.aureus</i> -spiked accuracy test sample-7                     | 10 <sup>4</sup> <i>S.aureus</i> cells | 0.994 |
| 44 | <i>S.aureus</i> -spiked accuracy test sample-8                     | 10 <sup>4</sup> <i>S.aureus</i> cells | 0.996 |
| 45 | <i>S.aureus</i> -spiked accuracy test sample-9                     | 10 <sup>3</sup> <i>S.aureus</i> cells | 0.994 |
| 46 | <i>S.aureus</i> -spiked accuracy test sample-10                    | 10 <sup>3</sup> <i>S.aureus</i> cells | 0.993 |
| 47 | <i>S.aureus</i> -spiked accuracy test sample-11                    | 10 <sup>3</sup> <i>S.aureus</i> cells | 0.993 |
| 48 | <i>S.aureus</i> -spiked accuracy test sample-12                    | 10 <sup>3</sup> <i>S.aureus</i> cells | 0.994 |
| 49 | <i>S.aureus</i> -spiked accuracy test sample-13                    | 10 <sup>3</sup> <i>S.aureus</i> cells | 0.987 |
| 50 | <i>S.aureus</i> -spiked accuracy test sample-14                    | 10 <sup>2</sup> <i>S.aureus</i> cells | 0.985 |
| 51 | <i>S.aureus</i> -spiked accuracy test sample-15                    | 10 <sup>2</sup> <i>S.aureus</i> cells | 0.983 |
| 52 | <i>S.aureus</i> -spiked accuracy test sample-16                    | 10 <sup>2</sup> <i>S.aureus</i> cells | 0.949 |
| 53 | <i>S.aureus</i> -spiked accuracy test sample-17                    | 10 <i>S.aureus</i> cells              | 0.989 |
| 54 | <i>S.aureus</i> -spiked accuracy test sample-18                    | 10 <i>S.aureus</i> cells              | 0.982 |
| 55 | <i>S.aureus</i> -spiked accuracy test sample-19                    | 10 <i>S.aureus</i> cells              | 0.978 |
| 56 | <i>S.aureus</i> -spiked accuracy test sample-20                    | 10 <i>S.aureus</i> cells              | 0.714 |
| 57 | 3 bacteria-spiked whole blood-Group A-1                            | 10 <i>S.aureus</i> cells              | 0.990 |
| 58 | 3 bacteria-spiked whole blood-Group A-2                            | 10 <sup>2</sup> <i>S.aureus</i> cells | 0.993 |
| 59 | 3 bacteria-spiked whole blood-Group A-3                            | 10 <sup>2</sup> <i>S.aureus</i> cells | 0.991 |
| 60 | 3 bacteria-spiked whole blood-Group B-1                            | 10 <i>S.aureus</i> cells              | 0.991 |
| 61 | 3 bacteria-spiked whole blood-Group B-2                            | 10 <i>S.aureus</i> cells              | 0.985 |
| 62 | 3 bacteria-spiked whole blood-Group B-3                            | 10 <i>S.aureus</i> cells              | 0.992 |
| 63 | 3 bacteria-spiked whole blood-Group C-1                            | 10 <sup>2</sup> <i>S.aureus</i> cells | 0.969 |
| 64 | 3 bacteria-spiked whole blood-Group C-2                            | 10 <i>S.aureus</i> cells              | 0.982 |
| 65 | 3 bacteria-spiked whole blood-Group C-3                            | 10 <i>S.aureus</i> cells              | 0.970 |
| 66 | Positive BC bottle 1                                               | 10 <sup>5</sup> <i>E.coli</i> cells   | 0.835 |
| 67 | Positive BC bottle 2                                               | 10 <sup>5</sup> <i>E.coli</i> cells   | 0.888 |
| 68 | Positive BC bottle 3                                               | 10 <sup>5</sup> <i>S.aureus</i> cells | 0.981 |
| 69 | Positive BC bottle 4                                               | 10 <sup>5</sup> <i>S.aureus</i> cells | 0.954 |
| 70 | 100 cells mL <sup>-1</sup> <i>E.coli</i> -BC bottle I-culture 4h   | 10 <i>E.coli</i> cells                | 0.927 |
| 71 | 100 cells mL <sup>-1</sup> <i>E.coli</i> -BC bottle I-culture 6h   | 10 <sup>4</sup> <i>E.coli</i> cells   | 0.959 |
| 72 | 100 cells mL <sup>-1</sup> <i>E.coli</i> -BC bottle I-culture 8h   | 10 <sup>5</sup> <i>E.coli</i> cells   | 0.913 |
| 73 | 100 cells mL <sup>-1</sup> <i>E.coli</i> -BC bottle II-culture 4h  | 10 <i>E.coli</i> cells                | 0.867 |
| 74 | 100 cells mL <sup>-1</sup> <i>E.coli</i> -BC bottle II-culture 6h  | 10 <sup>3</sup> <i>E.coli</i> cells   | 0.876 |
| 75 | 100 cells mL <sup>-1</sup> <i>E.coli</i> -BC bottle II-culture 8h  | 10 <sup>5</sup> <i>E.coli</i> cells   | 0.897 |
| 76 | 1000 cells mL <sup>-1</sup> <i>E.coli</i> -BC bottle I-culture 2h  | 10 <i>E.coli</i> cells                | 0.898 |
| 77 | 1000 cells mL <sup>-1</sup> <i>E.coli</i> -BC bottle I-culture 4h  | 10 <sup>4</sup> <i>E.coli</i> cells   | 0.941 |
| 78 | 1000 cells mL <sup>-1</sup> <i>E.coli</i> -BC bottle I-culture 6h  | 10 <sup>5</sup> <i>E.coli</i> cells   | 0.973 |
| 79 | 1000 cells mL <sup>-1</sup> <i>E.coli</i> -BC bottle II-culture 2h | 10 <i>E.coli</i> cells                | 0.936 |
| 80 | 1000 cells mL <sup>-1</sup> <i>E.coli</i> -BC bottle II-culture 4h | 10 <sup>4</sup> <i>E.coli</i> cells   | 0.952 |
| 81 | 1000 cells mL <sup>-1</sup> <i>E.coli</i> -BC bottle II-culture 6h | 10 <sup>5</sup> <i>E.coli</i> cells   | 0.950 |
